# Supplementary material
Source: Elsevier journal article supplement (https://agroparistech.hal.science/hal-03451358v1/file/mmc4.pdf)

a

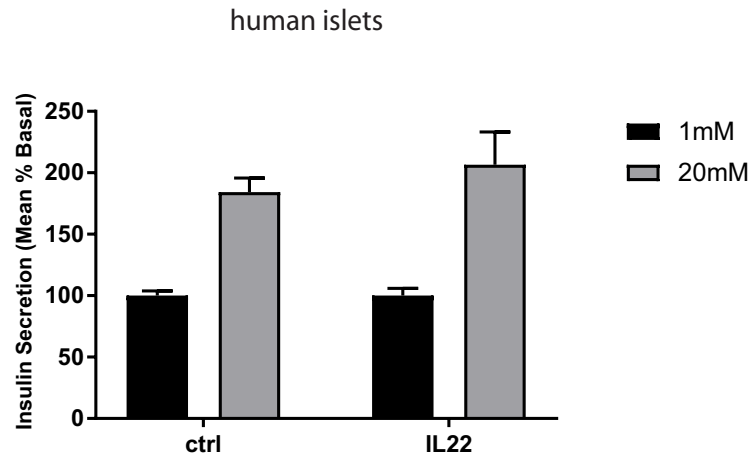

b

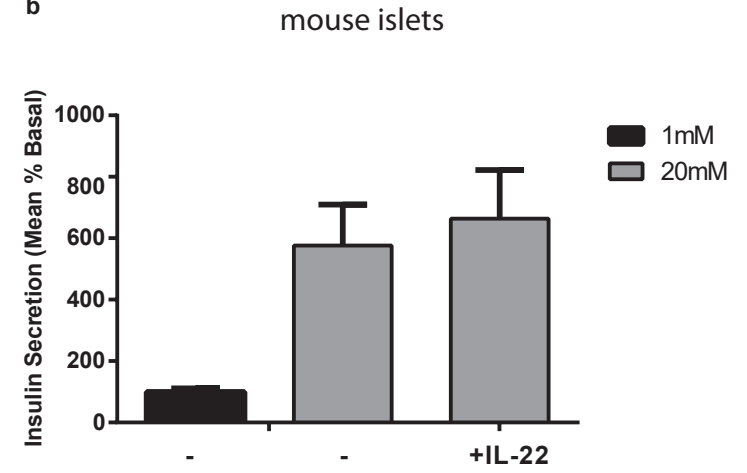

c

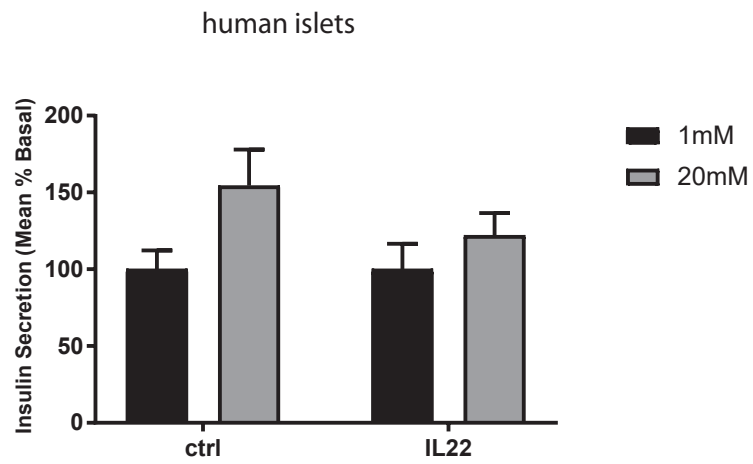

d

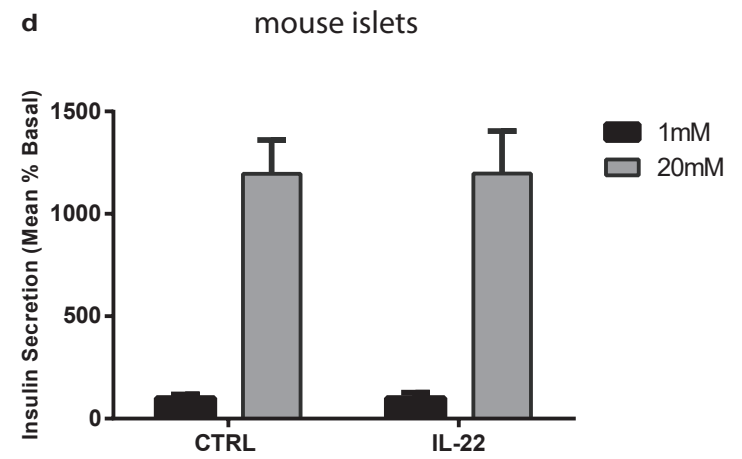

Supplement: mmc4 [file mmc4.pdf]
